# Supplementary material for: A missense mutation in TCN2 is associated with decreased risk for congenital heart defects and may increase cellular uptake of vitamin B12 via Megalin
Source: PubMed Central journal article supplement (PMC5589654; doi:10.18632/oncotarget.19377), 2017-07-19
Supplement: oncotarget-08-55216-s001.pdf [file oncotarget-08-55216-s001.pdf]

**A missense mutation in *TCN2* is associated with decreased risk for congenital heart defects and may increase cellular uptake of vitamin B12 via Megalin**

**SUPPLEMENTARY MATERIALS**

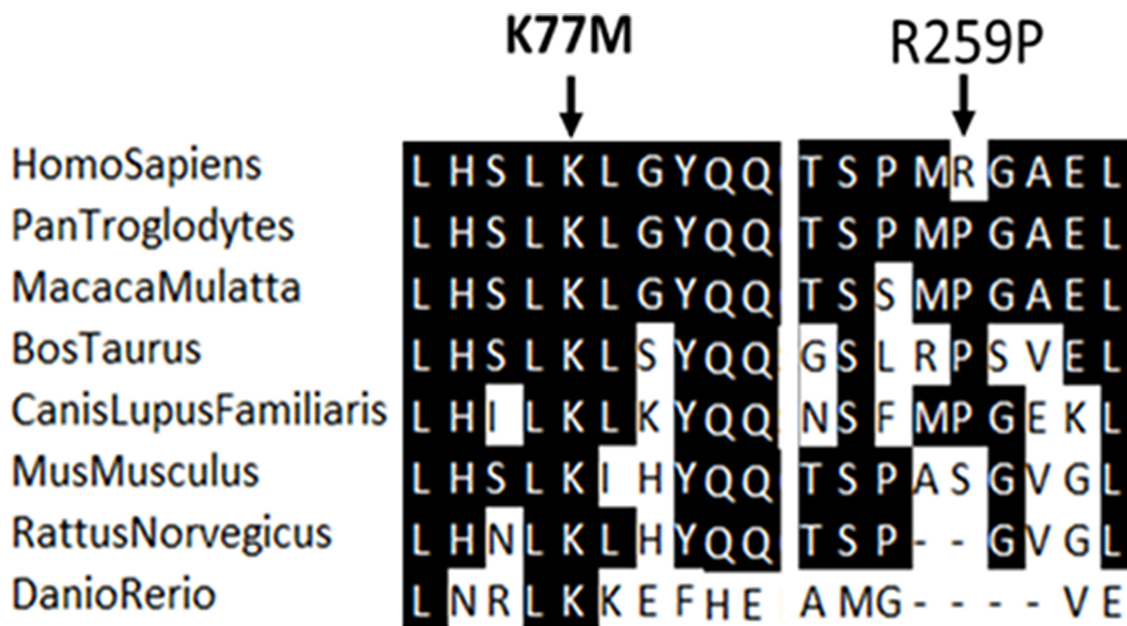

Supplementary Figure 1: Alignment of TCN2 ortholog protein sequences using the ClustalW method.

**Supplementary Table 1: The detail information of in CHD cases and controls**

| <b>Variable</b>           | <b>Cases (%)</b>           | <b>Controls (%)</b> | <b>P value</b>  |
|---------------------------|----------------------------|---------------------|-----------------|
| Stage 1, Sequencing Group | 412                        | 213                 |                 |
| Age, years (mean ± SD)    | 2.9 ± 2.5                  | 7.2 ± 3.7           | <i>P</i> < 0.01 |
| Gender                    |                            |                     |                 |
| Male                      | 229 (55.6%)                | 106 (49.8%)         | 0.10            |
| Female                    | 183 (44.4%)                | 107 (50.2%)         |                 |
| Stage 2, Validation Group | 412                        | 1177                |                 |
| Age, years (mean ± SD)    | 4.4 ± 5.2                  | 27.7 ± 15.1         | <i>P</i> < 0.01 |
| Gender                    |                            |                     |                 |
| Male                      | 201 (48.8%)                | 630 (53.5%)         | 0.10            |
| Female                    | 211 (51.2%)                | 547 (46.5%)         |                 |
| <b>CHM classification</b> | <b>Pooling sequenceing</b> | <b>Validation</b>   | <b>All</b>      |
| Septation defects         | 137 (33.3%)                | 275 (66.7%)         | 412 (50.0%)     |
| Conotruncal defects       | 140 (34.0%)                | 48 (11.7%)          | 188 (22.8%)     |
| RVOTO                     | 43 (10.4%)                 | 18 (4.4%)           | 61 (7.4%)       |
| PDA                       | 17 (4.1%)                  | 37 (9.0%)           | 54 (6.6%)       |
| LVOTO                     | 18 (4.4%)                  | 13 (3.2%)           | 31 (3.8%)       |
| AVSD                      | 20 (4.9%)                  | 7 (1.7%)            | 27 (3.3%)       |
| APVR                      | 11 (2.7%)                  | 7 (1.7%)            | 18 (2.2%)       |
| Complex                   | 10 (2.4%)                  | 2 (0.5%)            | 12 (1.5%)       |
| Heterotaxy                | 3 (0.7%)                   | 2 (0.5%)            | 5 (0.6%)        |
| Others                    | 13 (3.2%)                  | 3 (0.7%)            | 16 (1.9%)       |

RVOTO, Right Ventricular Outflow Tract Obstruction; PDA, patent ductus arteriosus; LVOTO, Left Ventricular Outflow Tract Obstruction; AVSD, Atrioventricular Septal Defect; APVR, Anomalous pulmonary venous return.

**Supplementary Table 2: Candidate Genes Selected for Association Study of Common Genetic Variation with CHD. See Supplementary\_Table\_2**

**Supplementary Table 3: DNA/RNA sequence of all used primer pairs**

| Primer Name          | Sequence (5'-3')               | Purpose        |
|----------------------|--------------------------------|----------------|
| rs75680863-F         | CTCTCCCACTGCCTTTCAG            | PCR/Sequence   |
| rs75680863-R         | AAAGTGGTGACAGGCCCAA            |                |
| rs1801198-F          | GGTGCTGGAACACCTAGCC            | PCR/Sequence   |
| rs1801198-R          | GCTCCATCCTGCAGACTGG            |                |
| Plasmid-F            | CCGCTCGAGATGAGGCACCTTGGGGCC    | Construct      |
| Plasmid-R            | CGGGGTACCCAGCTAACCAGCCTCAGCTCA |                |
| Mutation-F           | CACAGCCTCATGCTTGGTTAC          | Point mutation |
| Mutation-R           | GTAACCAAGCATGAGGCTGTG          |                |
| LRP2-F               | G TTCAGATGACGCGGATGAAA         | qPCR           |
| LRP2-R               | TCACAGTCTTGATCTTGGTCACA        |                |
| GAPDH-F              | GAAACTGTGGCGTGATGGC            | qPCR           |
| GAPDH-R              | CACCACTGACACGTTGGCAG           |                |
| LRP2 siRNA sense     | GCAGCUUACUUGUGACAAU            | knockdown      |
| LRP2 siRNA antisense | AUUGUCACAAGUAAGCUGC            | knockdown      |

**Supplementary Table 4: Association of common SNPs in folate-related genes with CHDs in the population of Northern China. See Supplementary\_Table\_4**
